# Supplementary material
Source: PubMed Central journal article supplement (PMC6007103)
Supplement: AEM.00485-18_zam013188569s1.pdf [file AEM.00485-18_zam013188569s1.pdf]

## **SUPPLEMENTAL MATERIAL**

**Title:** Redefinition and unification of the SXT/R391 family of integrative and conjugative elements

**Authors:** Audrey Bioteau,<sup>a</sup> Romain Durand,<sup>a</sup> Vincent Burrus<sup>a#</sup>

**Affiliations:**

<sup>a</sup>Département de biologie, Université de Sherbrooke, Sherbrooke, Quebec, Canada

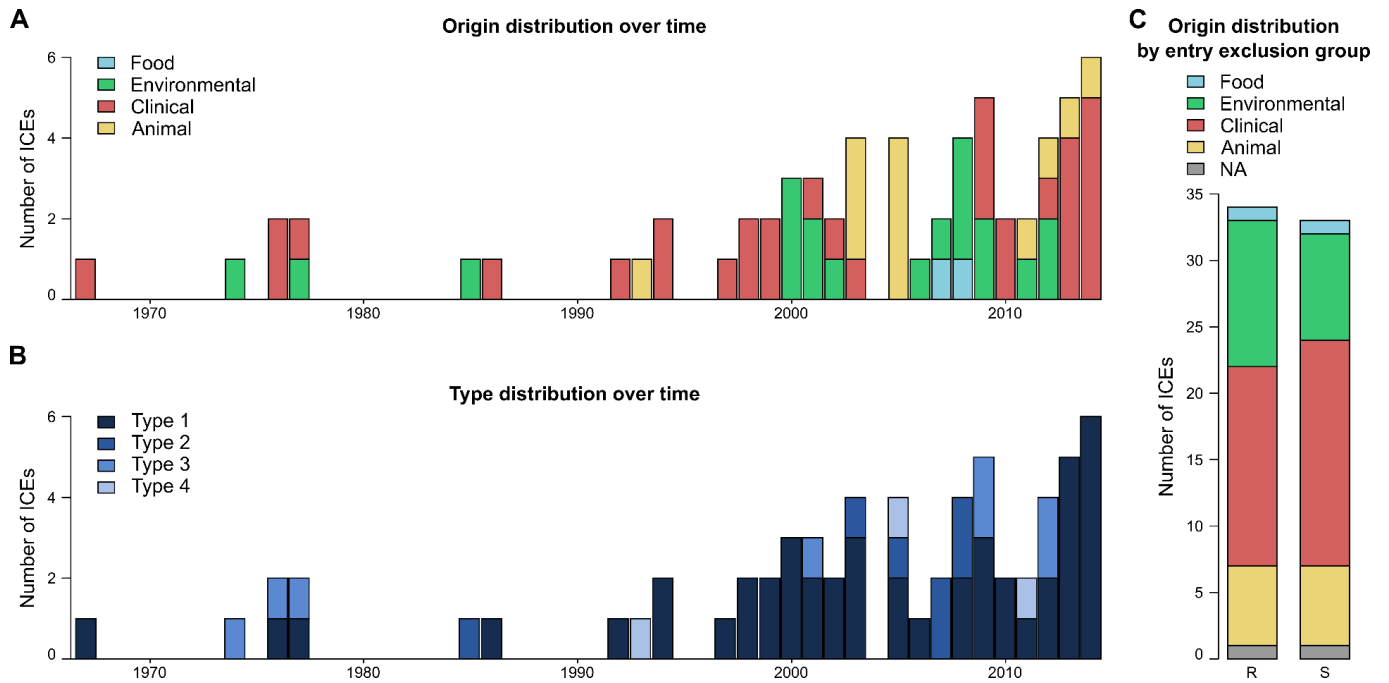

**Figure S1. Distribution of ICEs. (A)** Distribution of isolation niches and **(B)** ICE types over time. **(C)** Distribution of isolation niches according to exclusion group.

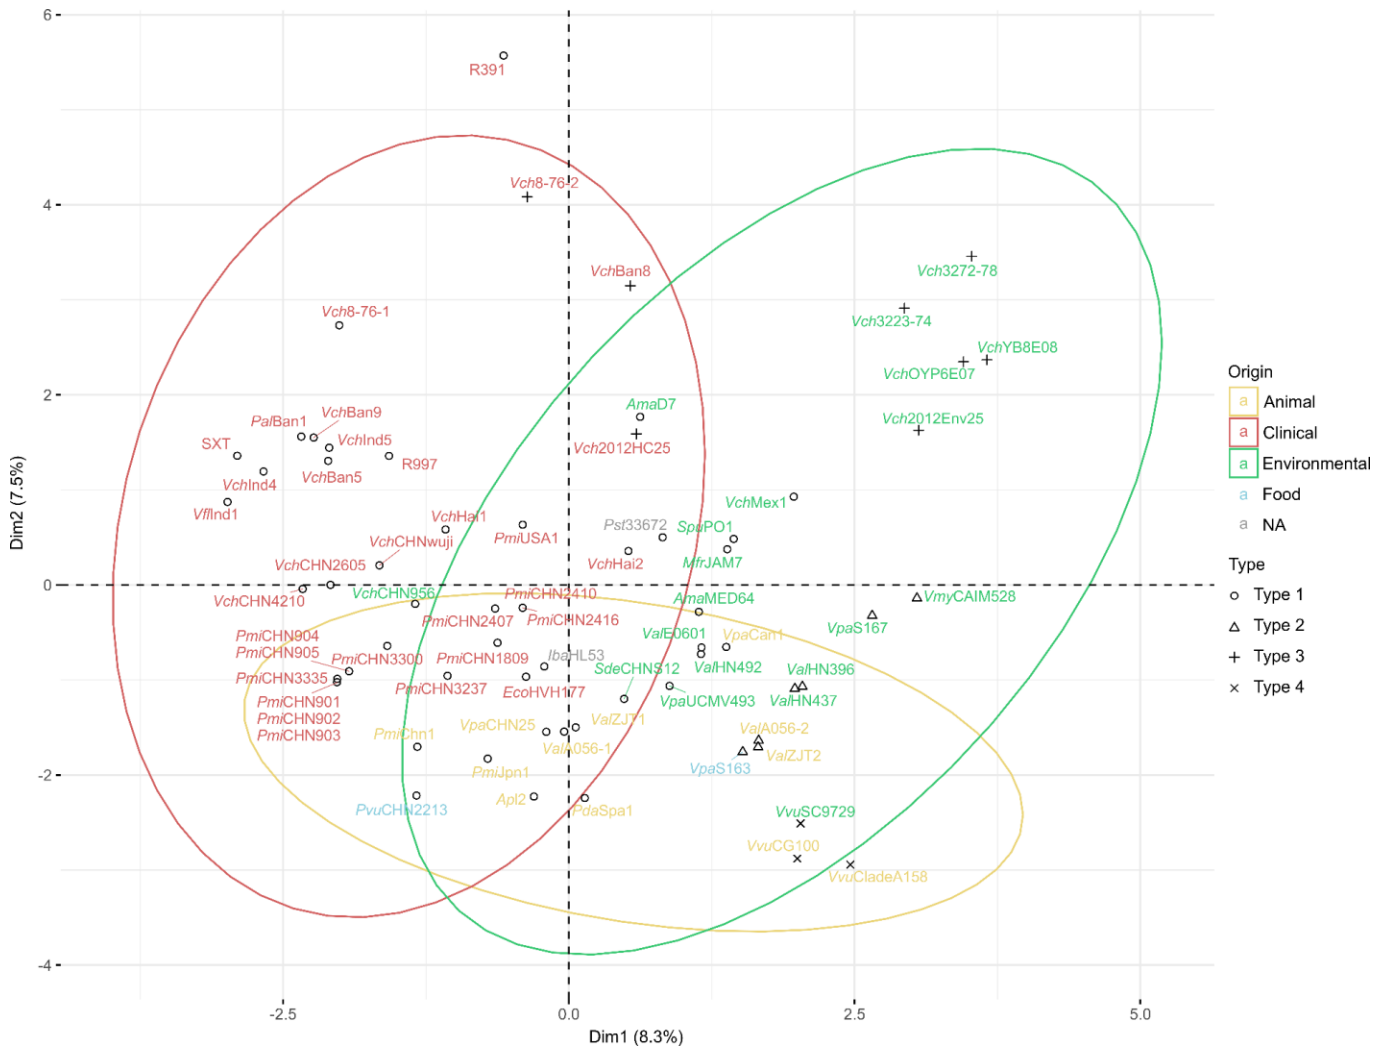

**Figure S2. Factorial Analysis of Mixed-Data.** Dimensions 1 and 2 explain 8.3 % and 7.5 % of the variance, respectively. Ellipses were drawn with a probability level of 0.95 except when they were too few points.

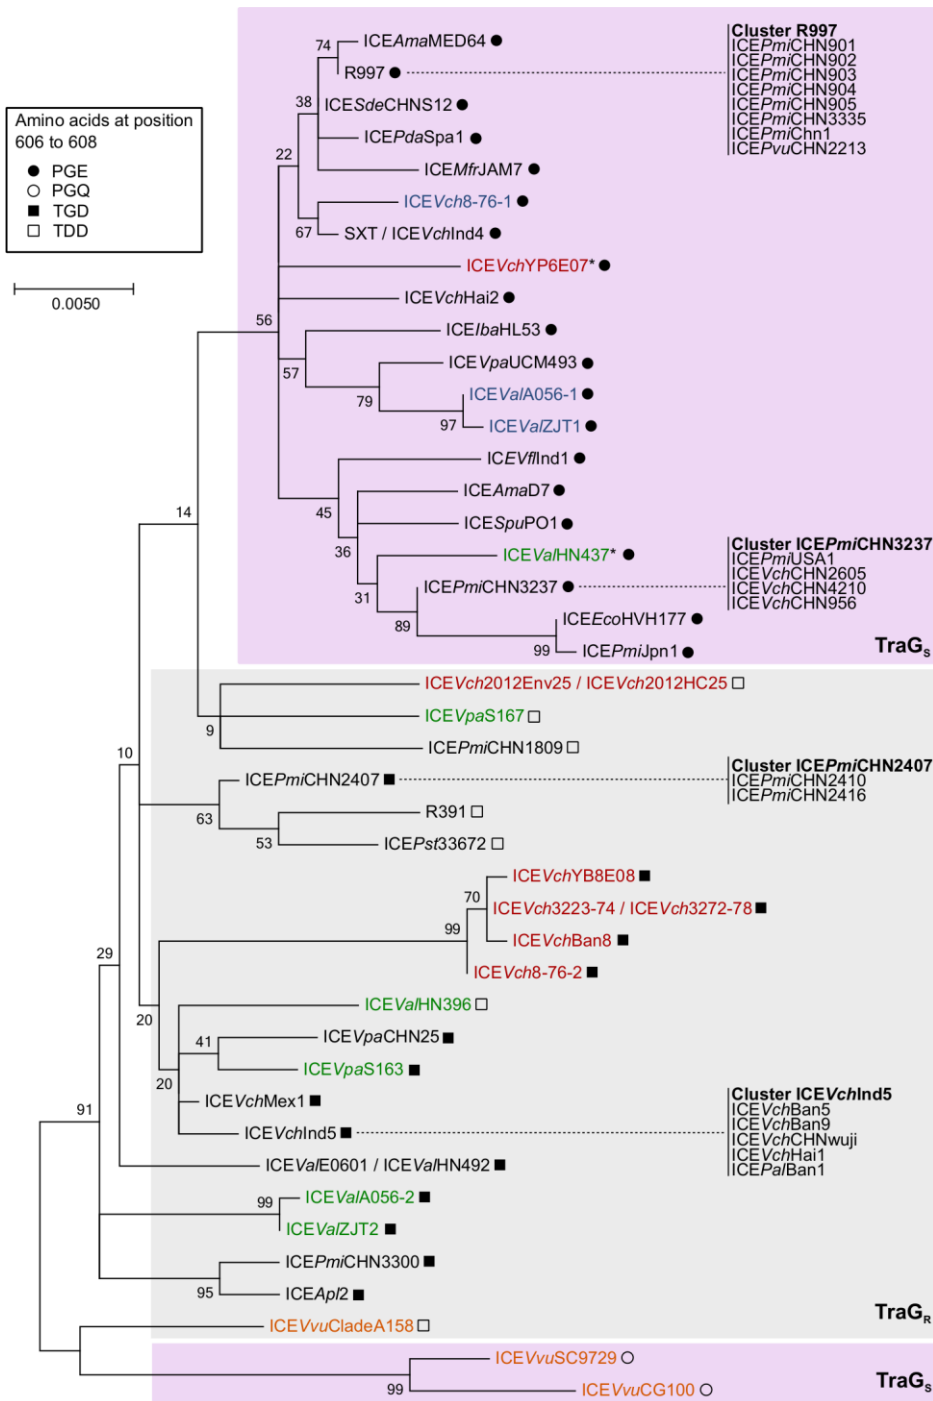

**Figure S3. Maximum likelihood phylogenetic analysis of 43 TraG orthologue proteins.** Bootstrap supports, as percentage, are indicated at the branching points. Branch length represents the number of substitutions per site over 1189 amino acid positions. Taxa corresponding to type 2, 3 and 4 ICEs are shown in green, dark red and orange, respectively. Taxa highlighted in blue correspond to type 1 ICEs found in strains also bearing a co-resident type 2 or 3 ICE. Asterisks indicate ICEs with an ambiguous entry exclusion group. Circles and squares indicate that the amino acid residues at positions 606 to 608 define either the S (PG[E/Q]) or R (T[G/D])D exclusion group.
